# Supplementary material
Source: MDPI journal article supplement (https://www.mdpi.com/2072-4292/15/14/3542)
Supplement: s1 [file s1 › remotesensing-2475743-Supplementary.pdf]

# Additional material

## Insuring Alpine grasslands against drought-related yield losses by Sentinel-2 satellite data

Mariapina Castelli <sup>1,\*</sup>, Giovanni Peratoner <sup>2</sup>, Luca Pasolli <sup>1</sup>, Giulia Molisse <sup>1,3</sup>, Alexander Dovas <sup>2</sup>, Gabriel Sicher <sup>2,4</sup>, Alice Crespi <sup>1,5</sup>, Mattia Rossi <sup>1,6</sup>, Mohammad Hussein Alasawedah <sup>1</sup>, Evelyn Soini <sup>7</sup>, Roberto Monsorno <sup>8</sup>, Claudia Notarnicola <sup>1</sup>

<sup>1</sup> Eurac Research, Institute for Earth Observation, 39100 Bolzano, Italy

<sup>2</sup> Laimburg Research Centre, Research Area Mountain Agriculture, 39040 Ora, Bolzano, Italy

<sup>3</sup> Trove Research, London EC3N 1LS, UK

<sup>4</sup> Hagelschutzkonsortium—Condifesa Bolzano, 39100 Bolzano, Italy

<sup>5</sup> Eurac Research, Center for Climate Change and Transformation, 39100 Bolzano, Italy

<sup>6</sup> European Commission, Joint Research Centre, 21027 Ispra, Varese, Italy

<sup>7</sup> Laimburg Research Centre, Research Area Agricultural Chemistry, 39040 Ora, Bolzano, Italy

<sup>8</sup> Eurac Research, Center for Sensing Solutions, 39100 Bolzano, Italy

\* Correspondence: mariapina.castelli@eurac.edu; Tel.: +39-0471-05-5381

**Table S1.**

Management and botanical composition of the investigated meadows at the test sites. The nutrient input was estimated according to the amount and the dilution of the liquid manures (slurry, manure effluent) as estimated by the farmers and to the reference values of the nutrient content of organic manures for South Tyrol [1]. AG = autumn grazing; FM = farmyard manure, ME = manure effluent, S = slurry, SL = liquid phase of separated slurry, BS = biogas slurry; G = grasses, L = legumes, F = forbs. The main species, listed by decreasing rank of yield proportion, are those providing 80% yield proportion. Ach mil = *Achillea millefolium*, Alo pra = *Alopecurus pratensis*, Ant syl = *Anthriscus sylvestris*, Arr ela = *Arrhenatherum elatius*, Bro hor = *Bromus hordeaceus*, Dac glo = *Dactylis glomerata*, Ely rep = *Elymus repens*, Fes pra = *Festuca pratensis*, Lol per = *Lolium perenne*, Phl pra = *Phleum pratense*, Poa pra = *Poa pratensis*, Poa tri = *Poa trivialis*, Ran acr = *Ranunculus acris*, Sil vul = *Silene vulgaris*, Tar off = *Taraxacum officinale*, Tri pra = *Trifolium pratense*, Tri rep = *Trifolium repens*.

| Site (Province) | Parcel Code | Cut frequency [cuts year <sup>-1</sup> ] | Manure type | Nutrient input [kg ha <sup>-1</sup> year <sup>-1</sup> ] |    |     | Species number | Yield proportion [%] |    |    | Main species                                                           |
|-----------------|-------------|------------------------------------------|-------------|----------------------------------------------------------|----|-----|----------------|----------------------|----|----|------------------------------------------------------------------------|
|                 |             |                                          |             | Total N                                                  | P  | K   |                | G                    | L  | F  |                                                                        |
| Laurerein (BZ)  | L1          | 2                                        | FM + ME     | 112                                                      | 24 | 157 | 27             | 69                   | 9  | 22 | Lol per, Dac glo, Phl pra, Bro hor, Poa pra, Tar off, Tri rep, Sil vul |
|                 | L2          | 3                                        |             |                                                          |    |     | 24             | 72                   | 20 | 8  | Poa pra, Tri rep, Dac glo, Ely rep                                     |
| Ritten (BZ)     | R1          | 3 + AG                                   | S + SL      | 183                                                      | 33 | 240 | 19             | 69                   | 12 | 19 | Dac glo, Alo pra, Tri rep, Fes pra, Poa tri, Tar off, Ran acr          |
|                 | R2          | 3 + AG                                   |             |                                                          |    |     | 15             | 75                   | 18 | 7  | Dac glo, Alo pra, Tri rep, Fes pra, Poa pra                            |
|                 | R3          | 4                                        | FM + S      | 189                                                      | 45 | 192 | 19             | 83                   | 4  | 13 | Alo pra, Poa pra, Bro hor, Tar off                                     |
|                 | R4          | 4                                        |             |                                                          |    |     | 11             | 85                   | 11 | 4  | Alo pra, Poa tri, Tri pra                                              |
| Fondo (TN)      | F1          | 3                                        | BS          | 179                                                      | 38 | 233 | 14             | 75                   | 0  | 25 | Alo pra, Ant syl                                                       |
|                 | F2          | 2                                        |             |                                                          |    |     | 8              | 99                   | 0  | 1  | Ely rep, Arr ela, Poa pra                                              |

**Figure S1.**

Flowchart of the methods for the experiment of S2 LAI enrichment by S1 SAR data

**Pilot test of S1-S2 data fusion, Section 3.3.**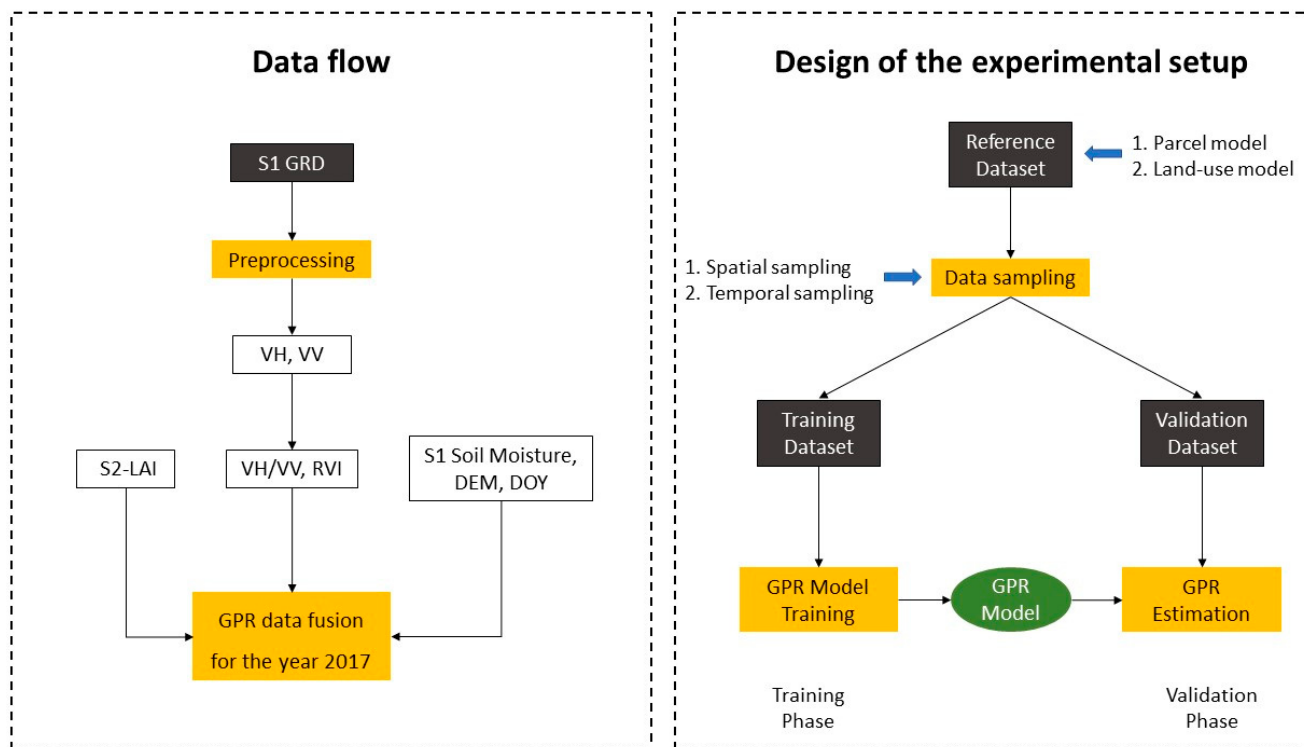

**Figure S2.**

Summary of the performances of the combinations of input features providing lowest RMSE and highest  $r$  for the different land uses. (a) and (b): RMSE and  $R^2$  for the parcel scale analysis. (c) and (d): RMSE and  $R^2$  for the analysis performed aggregating all the parcels with the same land use.

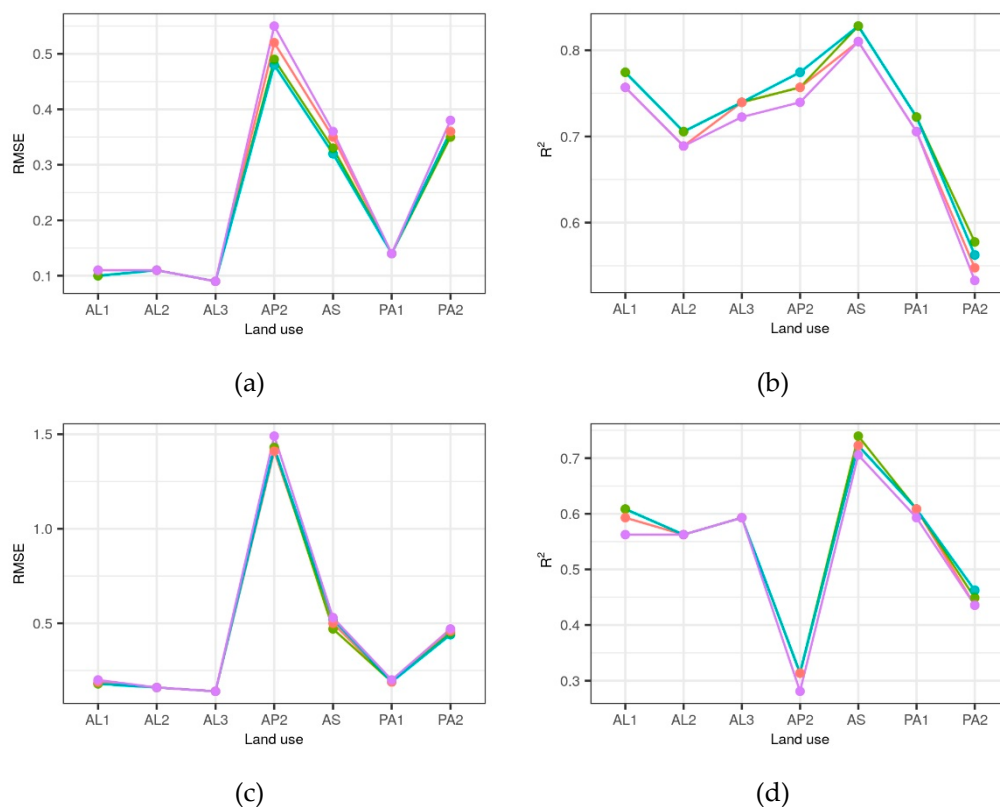**Combination**

- VH\_RATIO\_RVI\_SM\_DOY
- VH\_RATIO\_SM\_DOY
- VH\_SM\_DOY
- VH\_VV\_RATIO\_RVI\_SM\_DOY

AL1 = Summer pasture

AL2 = Wooded summer pasture (20% trees cover)

AL3 = Wooded summer pasture (50% trees cover)

AP2 = Permanent meadow

AS = Meadow, special area

PA1 = Pasture

PA2 = Wooded pasture (20% trees cover)

**Figure S3.**

Summary of the temporal gap-filling experiment for different numbers of missing acquisition dates. (a) and (b): RMSE and  $R^2$  for the parcel scale analysis. (c) and (d): RMSE and  $R^2$  for the analysis performed aggregating all the parcels with the same land use.

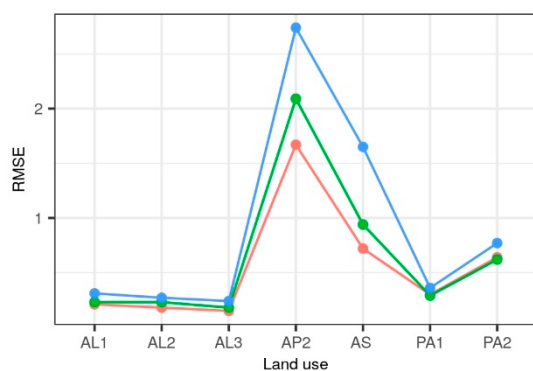

(a)

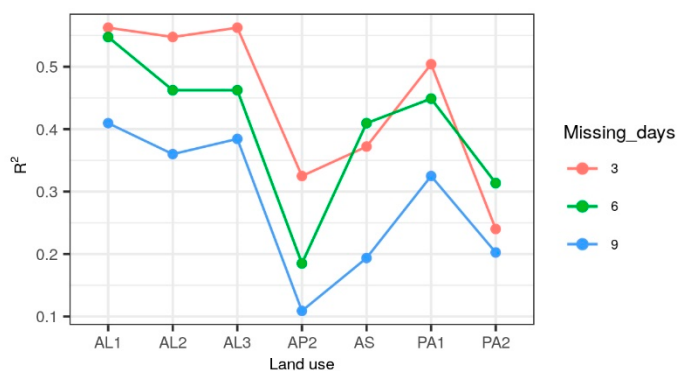

(b)

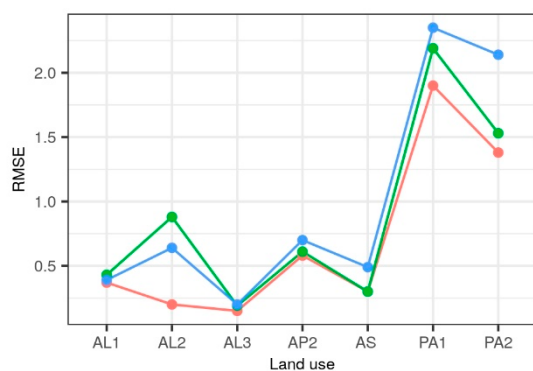

(c)

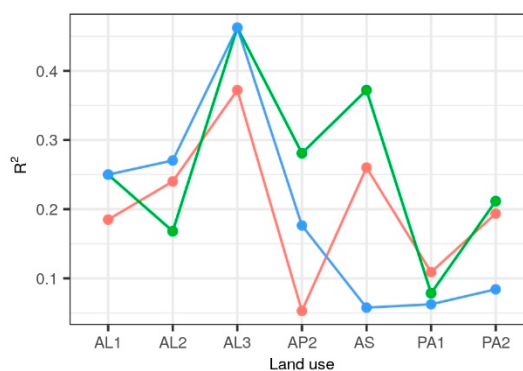

(d)

**Figure S4.**

Summary of the spatial gap-filling experiment for different dimension of the gaps, corresponding to 30%, 50%, or 70% of the pixels. (a) and (b): RMSE and  $R^2$  for the parcel scale analysis. (c) and (d): RMSE and  $R^2$  for the analysis performed aggregating all the parcels with the same land use.

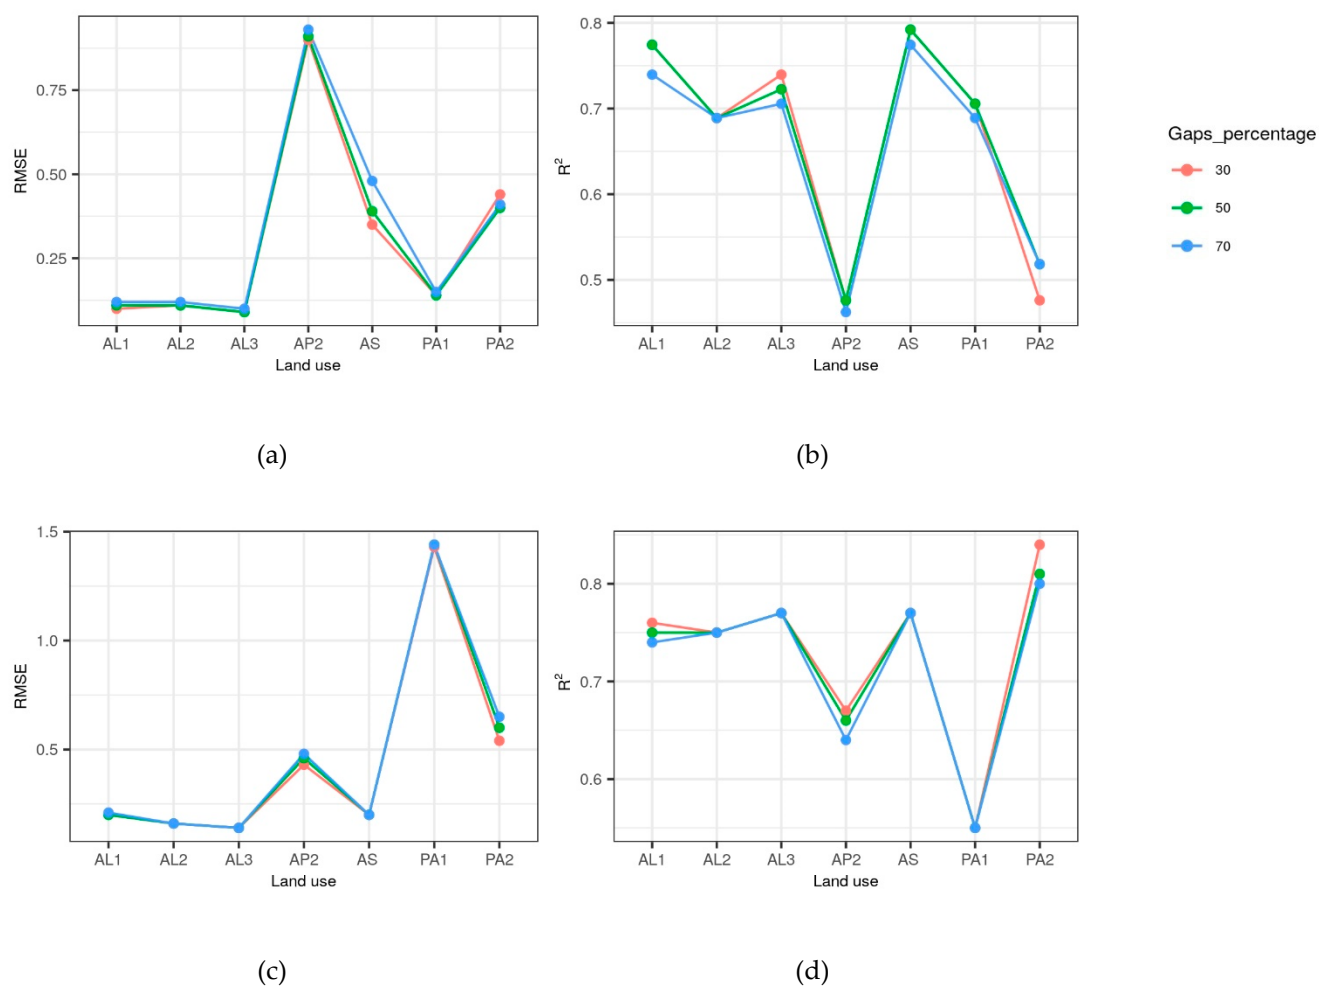

**Figure S5.**

Scatterplots of estimated GPI and yield (a) at pixel level considering all observations, (b) at pixel level without the observations close to mowing dates, (c) at parcel level considering all observations, and (d) at parcel level without the observations close to the mowing dates. The grey shaded areas represent the 95% confidence intervals of the slope of the regression line.

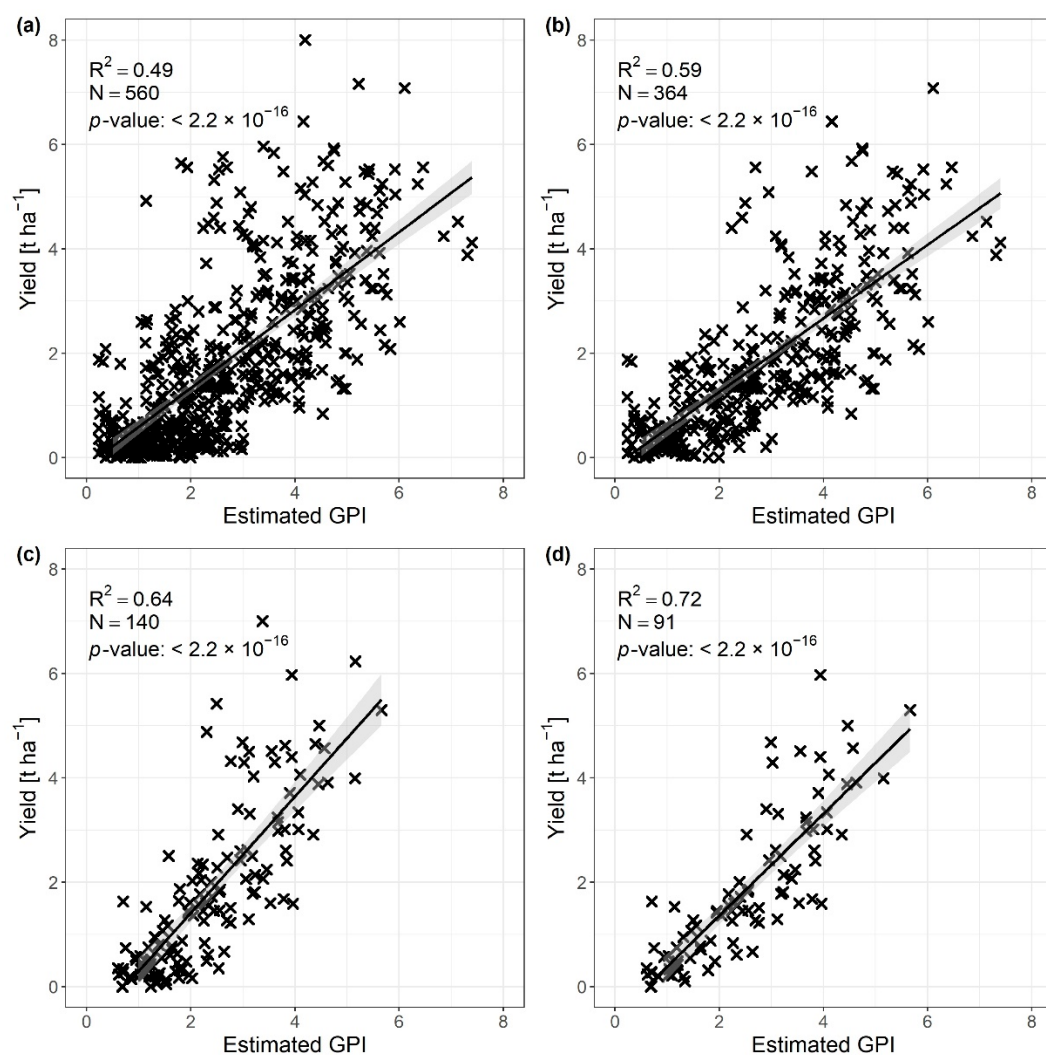

**Figure S6.**

Scatterplots of estimated LAI (referred to the date two days before yield sampling date) and yield (a) at pixel level considering all observations, (b) at pixel level without observations close to the mowing dates, (c) at parcel level considering all observations, and (d) at parcel level without observations close to the mowing dates. The grey shaded areas represent the 95% confidence intervals of the slope of the regression line.

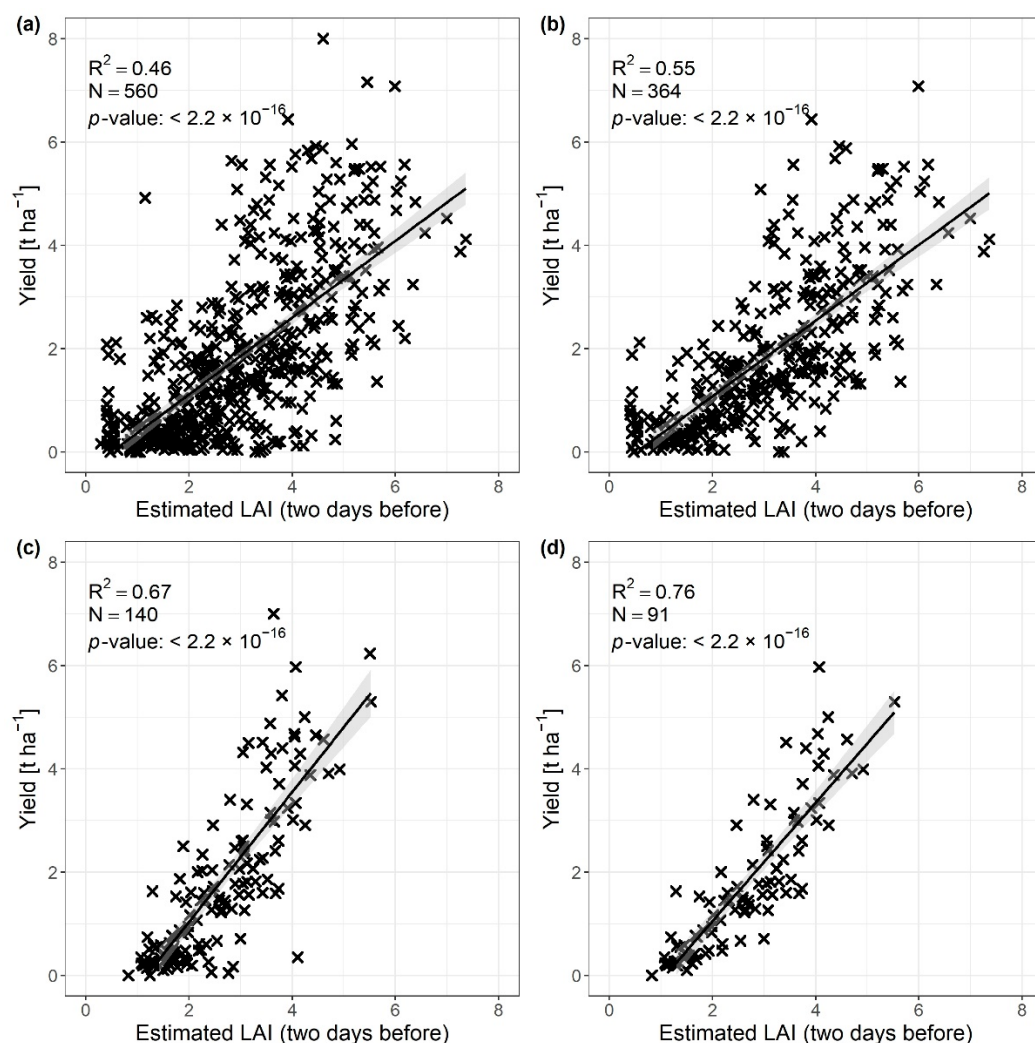

**Figure S7.**

Scatterplots of GPI (referred to the date two days before yield sampling date) and yield (a) at pixel level considering all observations, (b) at pixel level without observations close to the mowing dates, (c) at parcel level considering all observations, and (d) at parcel level without observations close to the mowing dates. The grey shaded areas represent the 95% confidence intervals of the slope of the regression line.

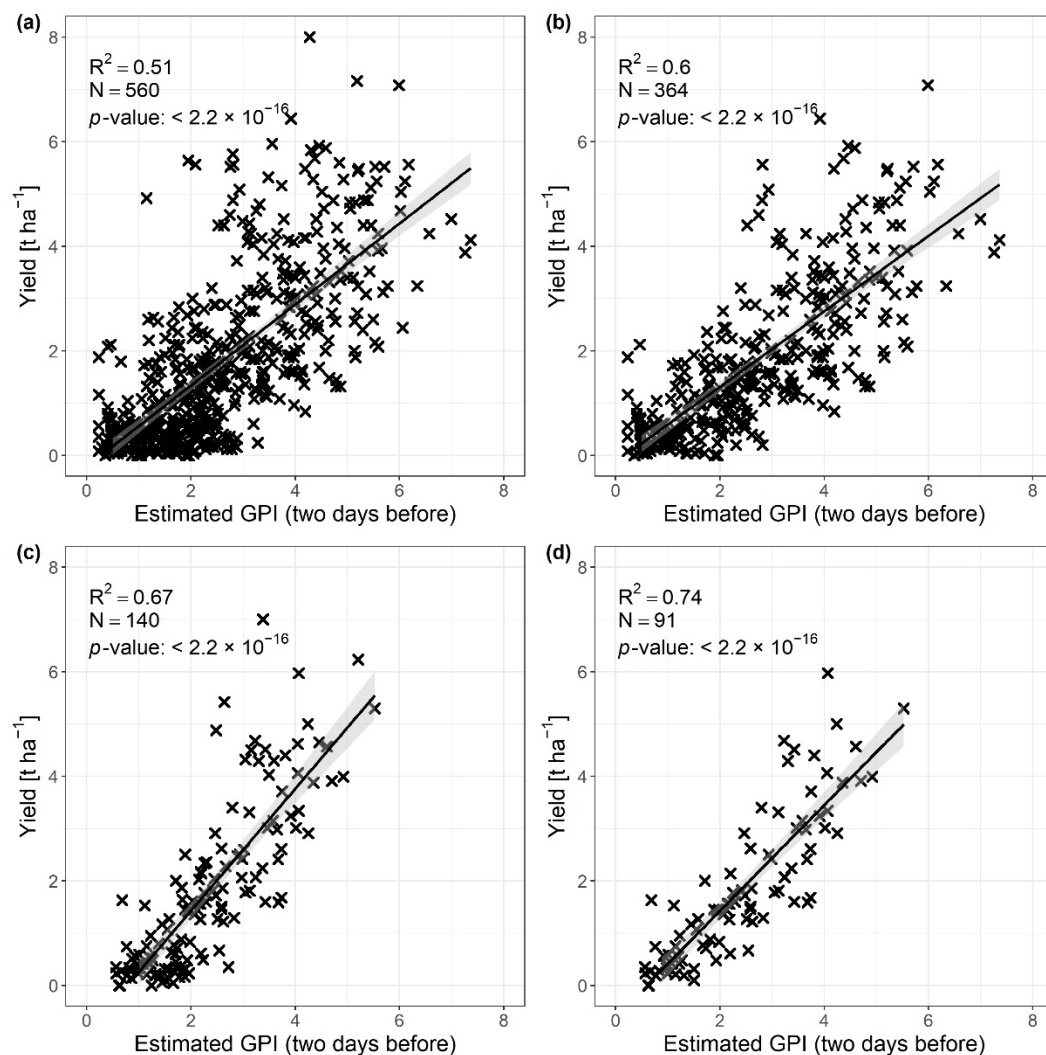

## Reference

1. Peratoner, G.; Sicher, G.; Matteazzi, A. Richtwerte des Nährstoffgehalts von Wirtschaftsdüngern in Südtirol. Tabellenwerk 2022. Pfatten/Vadena: Versuchszentrum Laimburg. 2022. Available online: <https://t1p.de/kmm9>.
